# Supplementary material for: The Analysis of Phenolic Compounds in Walnut Husk and Pellicle by UPLC-Q-Orbitrap HRMS and HPLC
Source: MDPI journal article supplement (doi:10.3390/molecules26103013), 2021-05-19
Supplement: s1 [file s1]

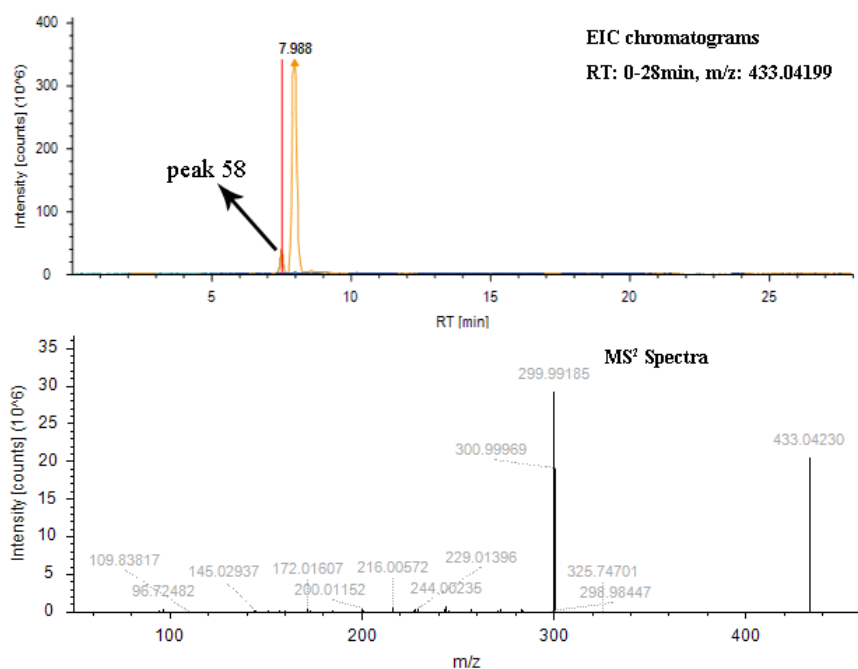

Figure S1. Extracted ion chromatograms (EIC) and tandem mass spectra (MS<sup>2</sup>) of ellagitannins identified in the extract of walnut. \* The peak numbers are according to Table 1.

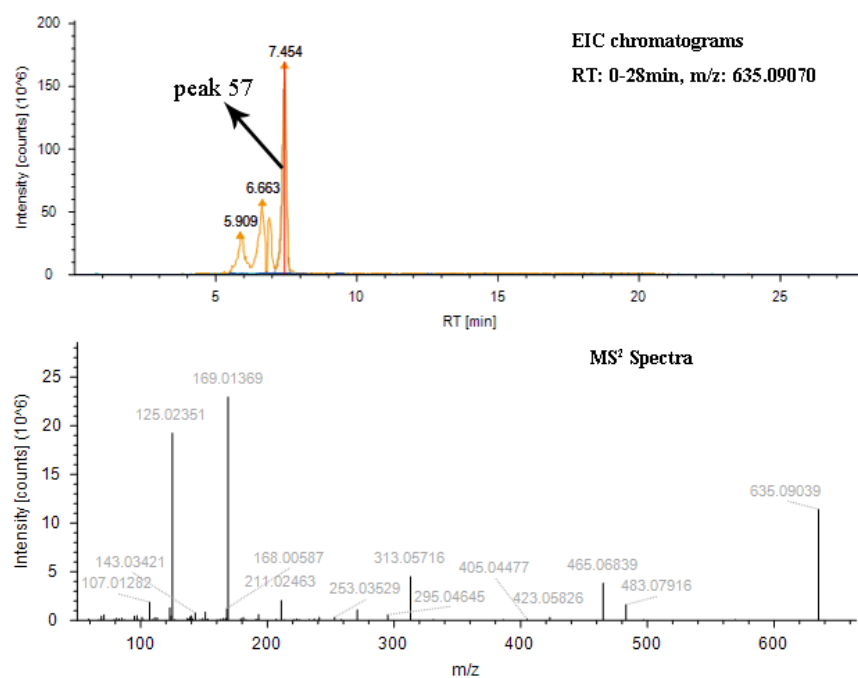

Figure S2. Extracted ion chromatograms (EIC) and tandem mass spectra (MS<sup>2</sup>) of gallotannins identified in the extract of walnut.

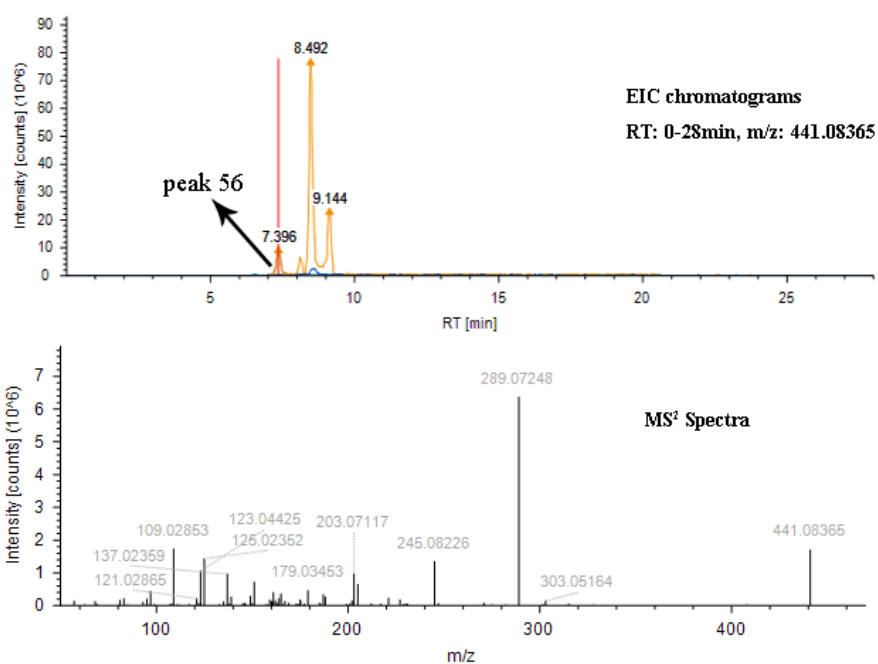

Figure S3. Extracted ion chromatograms (EIC) and tandem mass spectra (MS<sup>2</sup>) of flavonoids identified in the extract of walnut.

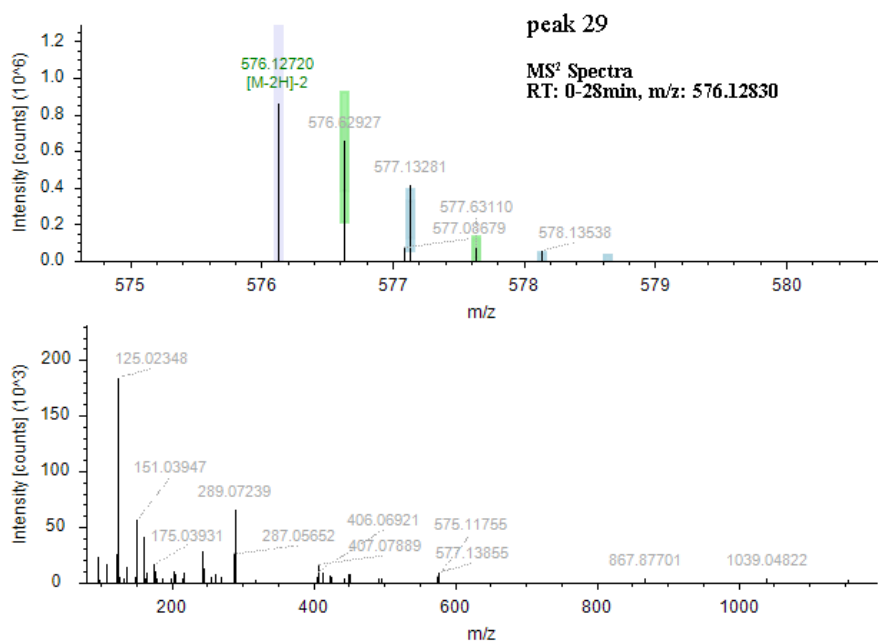

Figure S4. Extracted tandem mass spectra (MS<sup>2</sup>) of peak 29 identified in the extract of walnut.

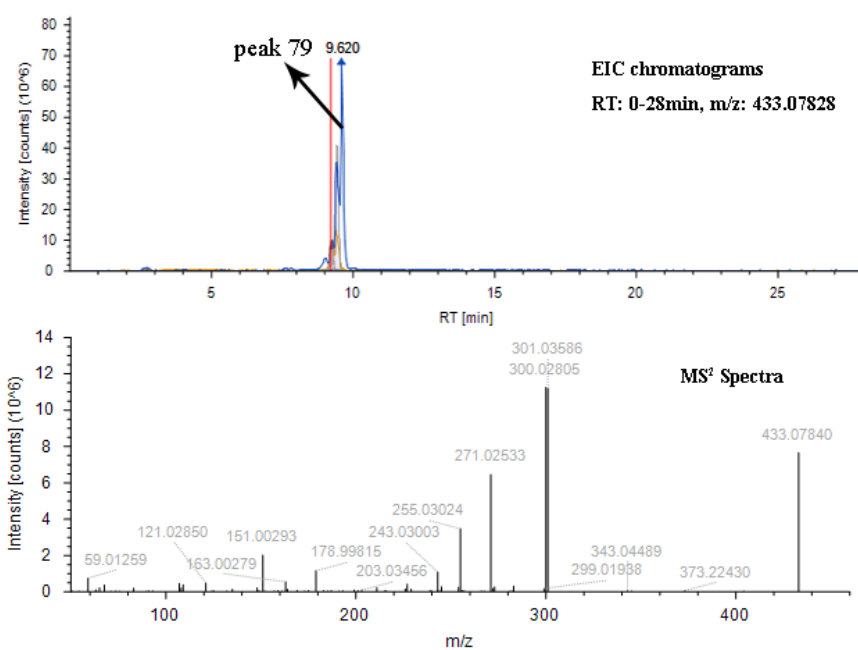

Figure S5. Extracted ion chromatograms (EIC) and tandem mass spectra (MS<sup>2</sup>) of flavonol identified in the extract of walnut.

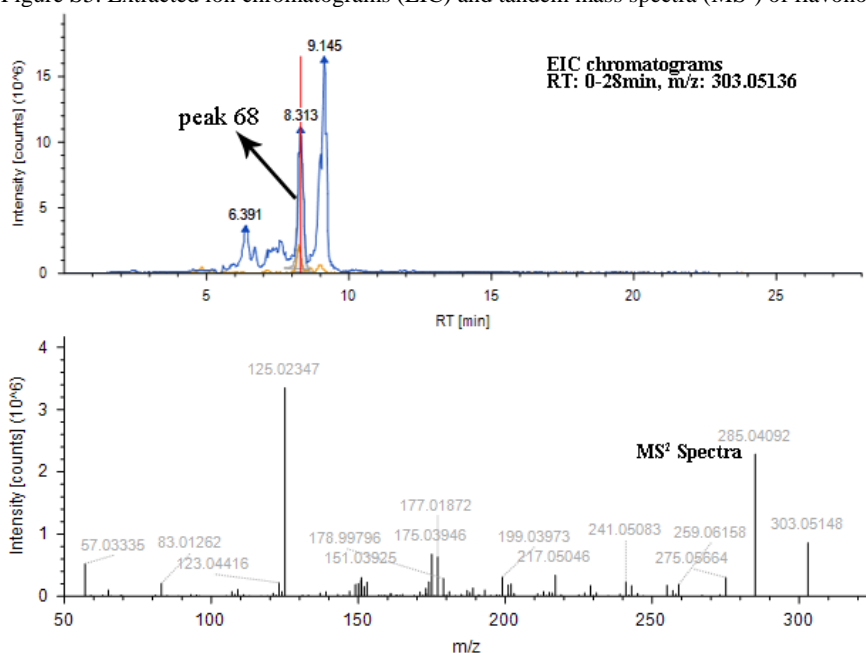

Figure S6. Extracted ion chromatograms (EIC) and tandem mass spectra (MS<sup>2</sup>) of flavanone identified in the extract of walnut.

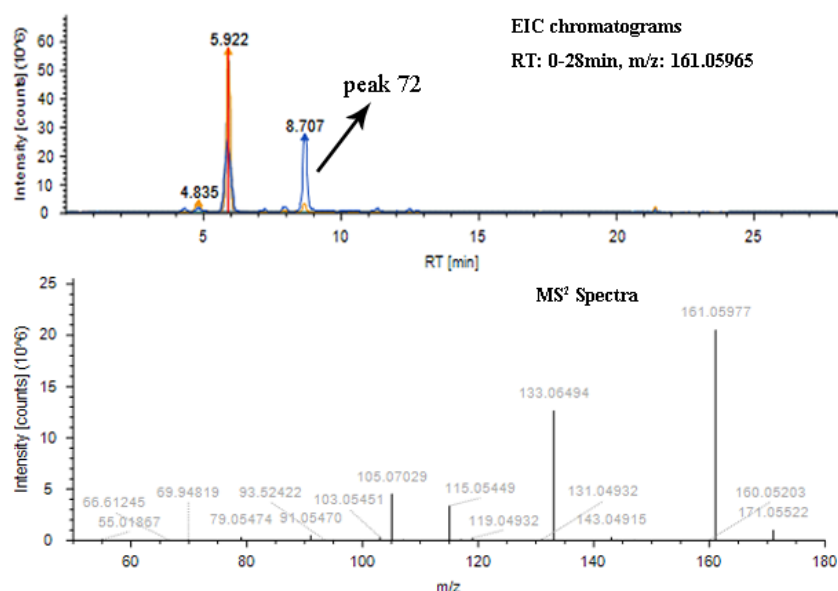

Figure S7. Extracted ion chromatograms (EIC) and tandem mass spectra (MS<sup>2</sup>) of quinones identified in the extract of walnut.

Table S1. Calibration curves, Retention time, Linear ranges, LODs and LOQs for 16 analytes

| Compound                      | Calibration curve    | R <sup>2</sup>          | Retention time | UV max (lambda in nm) | Linear ranges (µg/mL) | LOQ (µg/ml) | LOD (µg/ml) |
|-------------------------------|----------------------|-------------------------|----------------|-----------------------|-----------------------|-------------|-------------|
| gallic acid                   | y = 0.0004x - 0.0037 | R <sup>2</sup> = 0.9992 | 4.537          | 280                   | 10.00-625.00          | 1.20        | 0.36        |
| neochlorogenic acid           | y = 0.0007x - 0.0038 | R <sup>2</sup> = 0.9993 | 9.592          | 280                   | 10.00-625.00          | 0.52        | 0.16        |
| chlorogenic acid              | y = 0.0016x - 0.0029 | R <sup>2</sup> = 0.9996 | 14.470         | 280                   | 10.00-500.00          | 0.86        | 0.26        |
| catechin                      | y = 0.0008x - 0.0045 | R <sup>2</sup> = 0.9988 | 15.428         | 280                   | 5.00-625.00           | 0.54        | 0.16        |
| <i>p</i> -hydroxybenzoic acid | y = 0.0007x - 0.0047 | R <sup>2</sup> = 0.9986 | 16.959         | 280                   | 10.00-625.00          | 0.83        | 0.25        |
| vanillic acid                 | y = 0.0007x - 0.0042 | R <sup>2</sup> = 0.999  | 19.426         | 280                   | 10.00-625.00          | 1.00        | 0.30        |
| caffeic acid                  | y = 0.0003x - 0.0006 | R <sup>2</sup> = 0.9997 | 19.904         | 280                   | 5.00-500.00           | 0.40        | 0.12        |
| epicatechin                   | y = 0.0016x + 0.0014 | R <sup>2</sup> = 0.9988 | 22.004         | 280                   | 10.00-500.00          | 0.83        | 0.25        |
| syringic acid                 | y = 0.0004x - 0.0010 | R <sup>2</sup> = 0.9998 | 22.454         | 280                   | 5.00-500.00           | 0.38        | 0.11        |
| <i>p</i> -coumaric acid       | y = 0.0002x - 0.0005 | R <sup>2</sup> = 0.9998 | 28.144         | 280                   | 5.00-500.00           | 0.23        | 0.07        |
| ferulic acid                  | y = 0.0004x - 0.0011 | R <sup>2</sup> = 0.9997 | 31.285         | 280                   | 5.00-500.00           | 0.43        | 0.13        |
| <i>o</i> -coumaric acid       | y = 0.0002x - 0.0030 | R <sup>2</sup> = 0.9994 | 35.168         | 280                   | 10.00-625.00          | 0.31        | 0.09        |
| rutin                         | y = 0.0013x - 0.0336 | R <sup>2</sup> = 0.9971 | 10.410         | 251                   | 50.00-5000.00         | 1.88        | 0.56        |
| myricetin                     | y = 0.0123x - 0.1200 | R <sup>2</sup> = 0.9947 | 11.741         | 251                   | 50.00-5000.00         | 11.21       | 3.36        |
| quercetin                     | y = 0.0062x + 0.0025 | R <sup>2</sup> = 0.9981 | 14.710         | 251                   | 50.00-500.00          | 11.23       | 3.37        |
| juglone                       | y = 0.0007x + 0.0004 | R <sup>2</sup> = 0.9985 | 16.448         | 251                   | 10.00-500.00          | 1.10        | 0.33        |

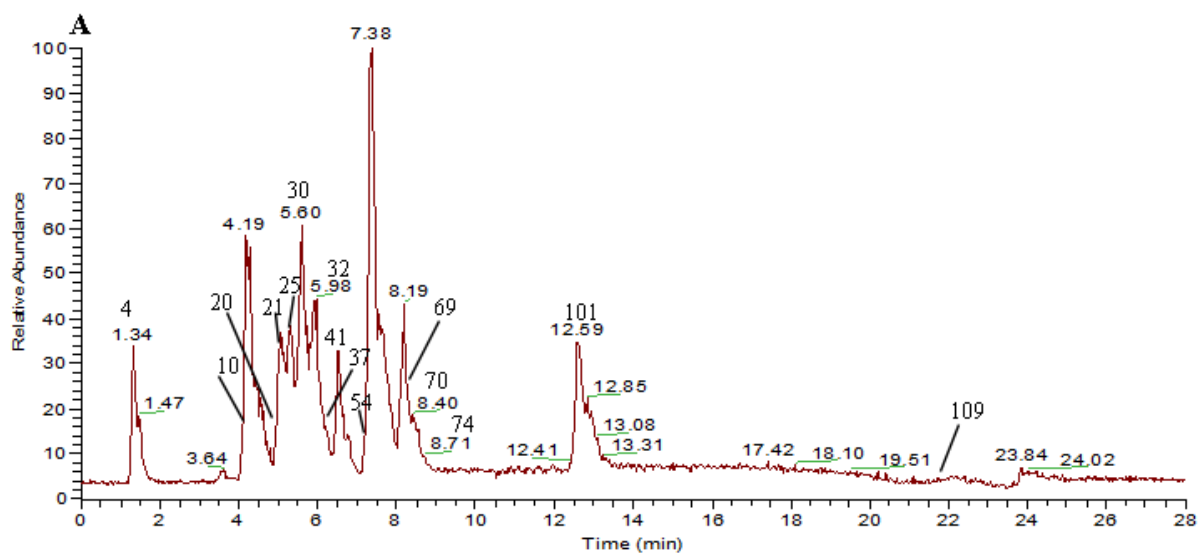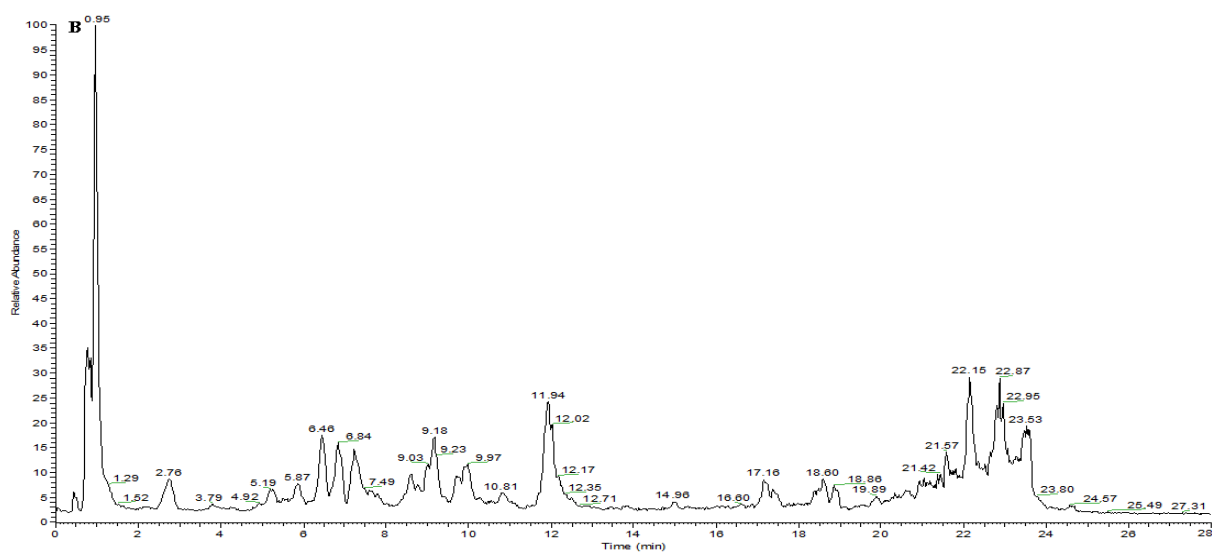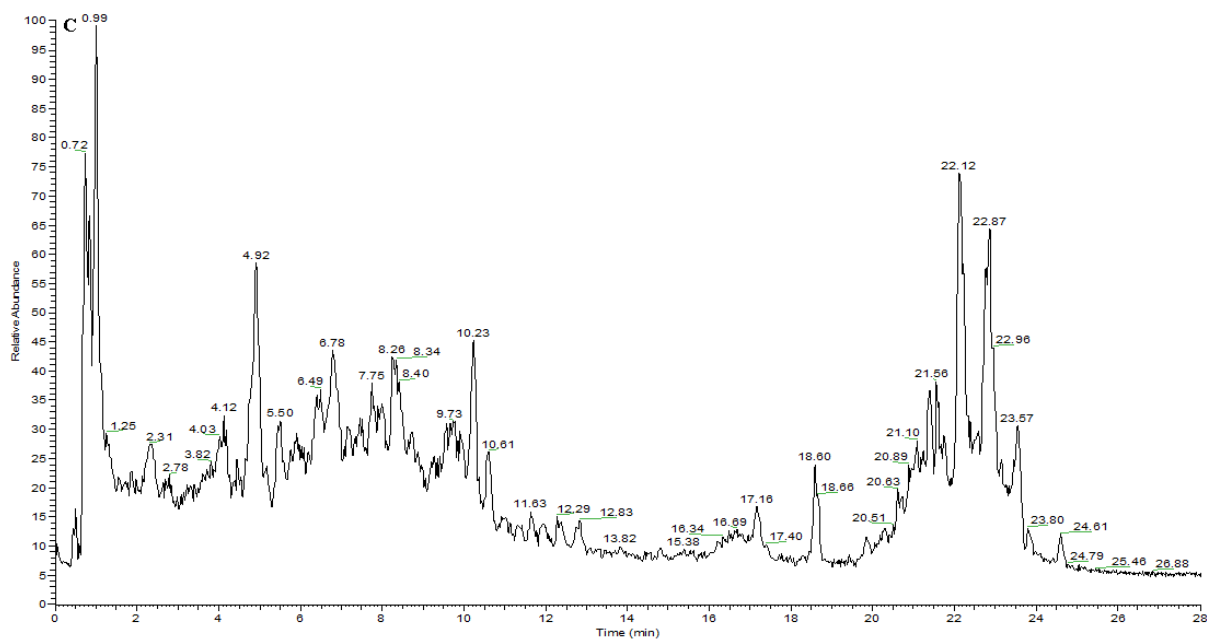

Figure S8. Total-ion chromatograms in negative mode of walnut husk and pellicle extracts. (A: Chromatogram of quantitative standards; B: Chromatogram of walnut husk; C: Chromatogram of walnut pellicle)

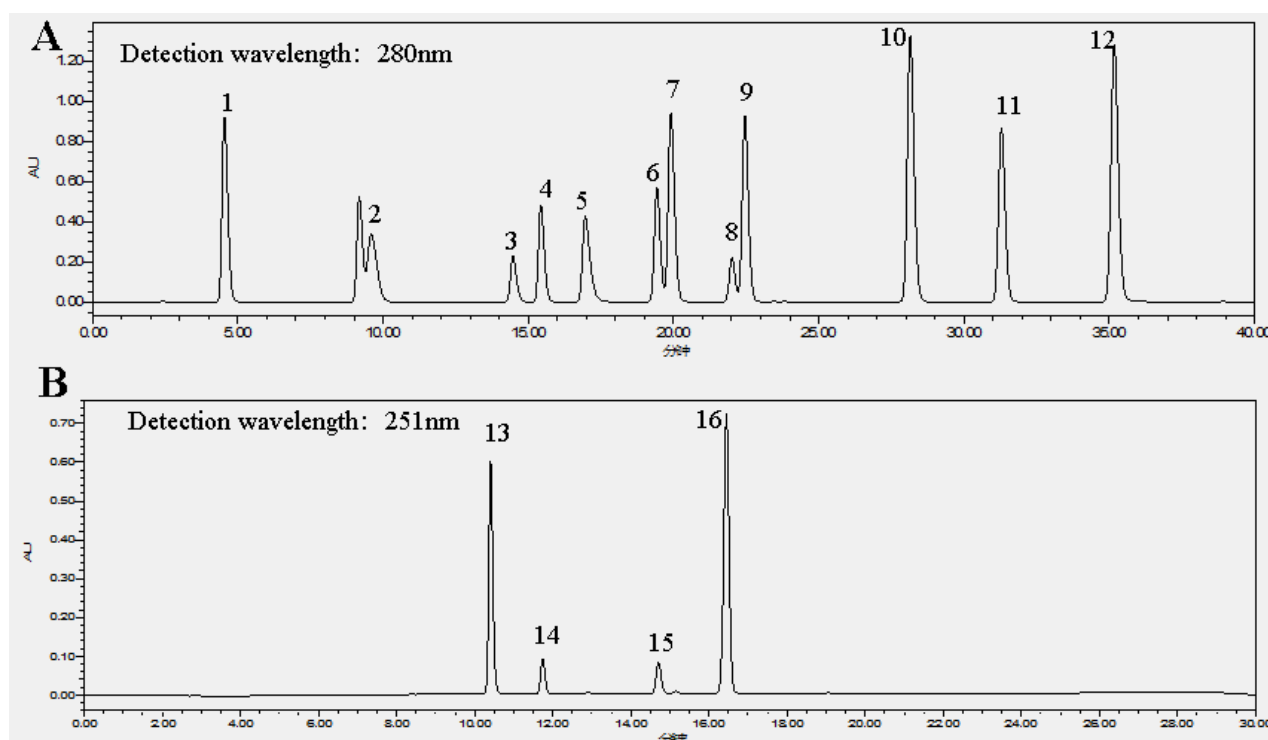

Figure S9. HPLC chromatogram of the standard optimized system (Note: 1. gallic acid; 2. neochlorogenic acid; 3. catechin; 4. *p*-hydroxybenzoic acid; 5. chlorogenic acid ; 6. vanillic acid; 7. caffeic acid; 8. epicatechin; 9. syringic acid; 10. *p*-coumaric acid; 11. ferulic acid; 12. *o*-coumaric acid; 13. rutin; 14. myricetin; 15. quercetin; 16. juglone)
